# Supplementary material
Source: publisher site journal article supplement (https://www.dovepress.com/article/343518)
Supplement: Supplementary file 1 [file get_supplementary_file.php]

## *Supplementary Material*

### 1.1 Supplementary Figures

**Figure S1.** Flowchart of patient selection.

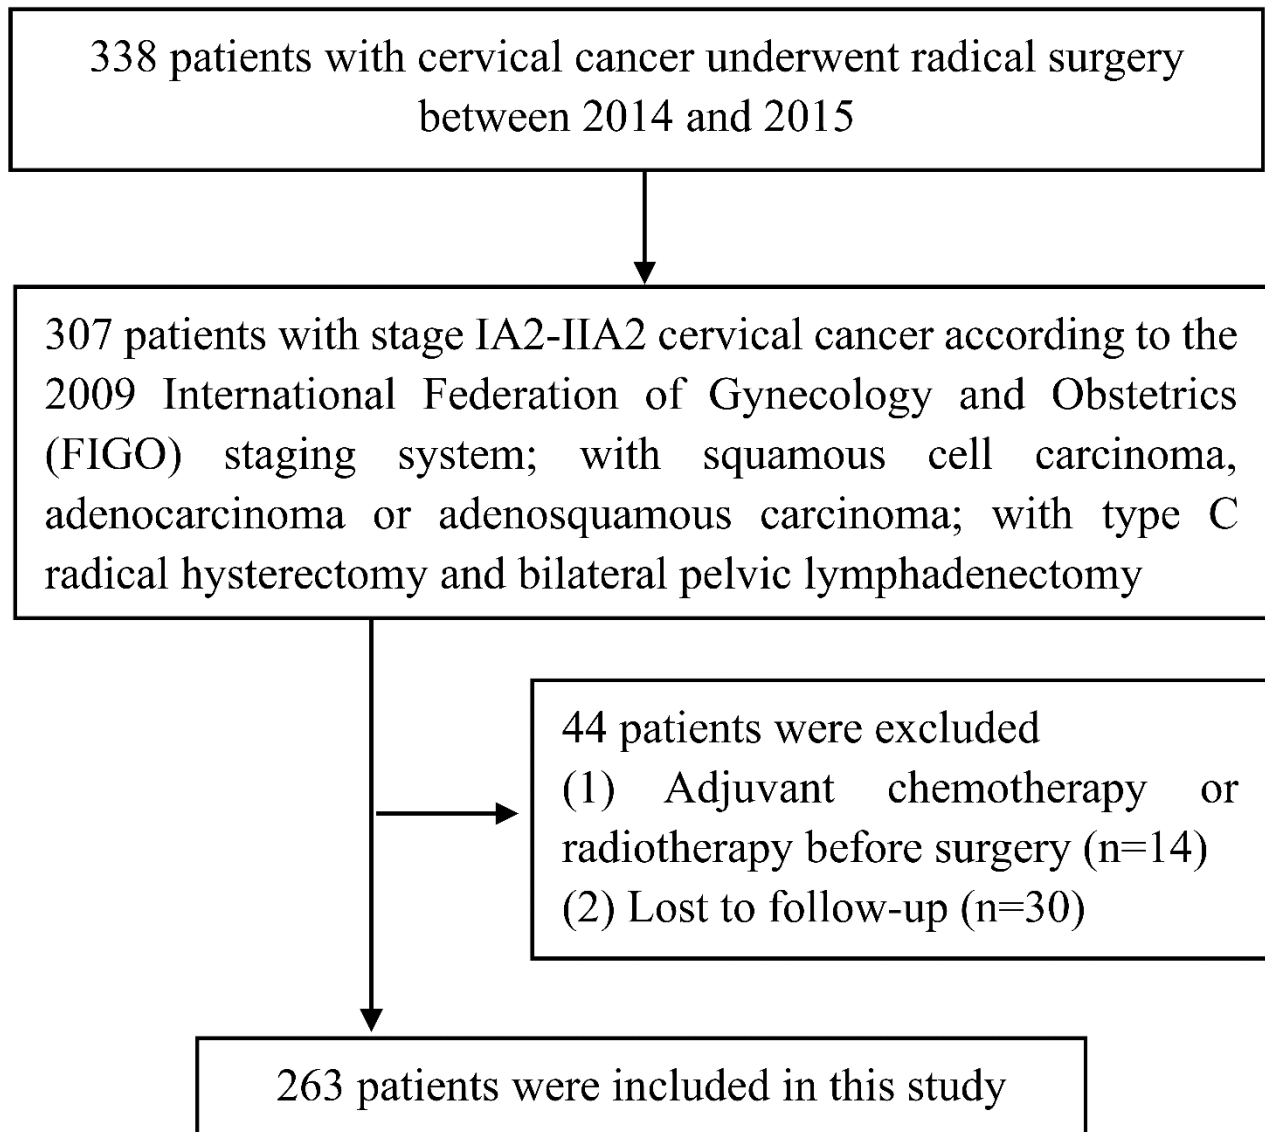

## 1.2 Supplementary Tables

**Table S1.** Clinical and pathological characteristics of 263 patients with cervical cancer

| Characteristic                     | N (%)        |
|------------------------------------|--------------|
| Clinical characteristics           |              |
| Age, mean (range), years           | 49.5 (29-78) |
| Stage                              |              |
| IA2                                | 4 (1.5)      |
| IB1                                | 158 (60.1)   |
| IB2                                | 35 (13.3)    |
| IIA1                               | 47 (17.9)    |
| IIA2                               | 19 (7.2)     |
| Tumor diameter, mean (SD), cm      | 3.2 (1.3)    |
| Histological type, n (%)           |              |
| Squamous cell carcinoma            | 213 (80.0)   |
| Adenocarcinoma                     | 41 (15.6)    |
| Adenosquamous carcinoma            | 9 (3.4)      |
| Grade, n (%)                       |              |
| G1                                 | 5 (1.9)      |
| G2                                 | 107 (40.7)   |
| G3                                 | 136 (51.7)   |
| Unknown                            | 15 (5.7)     |
| Pathological findings              |              |
| Stromal invasion depth >1/2, n (%) |              |
| No                                 | 117 (44.5)   |
| Yes                                | 146 (55.5)   |
| LVSI, n (%)                        |              |
| No                                 | 214 (81.4)   |
| Yes                                | 49 (18.6)    |
| PMI, n (%)                         |              |
| No                                 | 257 (97.7)   |
| Yes                                | 6 (2.3)      |

|                              |            |
|------------------------------|------------|
| RMI, n (%)                   |            |
| No                           | 258 (98.1) |
| Yes                          | 5 (1.9)    |
| LNM, n (%)                   |            |
| No                           | 206 (78.3) |
| Yes                          | 57 (21.7)  |
| Adjuvant radiotherapy, n (%) |            |
| No                           | 154 (58.6) |
| Yes                          | 109 (41.4) |
| Immunohistochemistry         |            |
| ER $\alpha$                  |            |
| Positive                     | 97 (36.9)  |
| Negative                     | 166 (63.1) |
| PR                           |            |
| Positive                     | 76 (28.9)  |
| Negative                     | 187 (71.1) |
| Adjuvant radiotherapy        |            |
| Positive                     | 109 (41.4) |
| Negative                     | 154 (58.6) |

---

LVSI, lymphovascular space invasion; PMI, parametrial involvement; RMI, resection margin involvement; LNM, lymph node metastasis; ER $\alpha$ , estrogen receptor alpha; PR, progesterone receptor; Among 109 patients receiving adjuvant radiotherapy, 90 patients received additional chemotherapy.
